# Supplementary material for: Comparative Analysis of Nursing Care Plans Produced by Artificial Intelligence Models (ChatGPT, Gemini, Deepseek) in Terms of Readability, Reliability and Quality
Source: Research Square preprint supplement (doi:10.21203/rs.3.rs-8080438/v1), 2025-11-18
Supplement: Supplementary file 1 [file be924381975fe61fb3dd09a1.docx]

| **Randomization table** | | | | | | | | | | |
| --- | --- | --- | --- | --- | --- | --- | --- | --- | --- | --- |
| 212 | 84 | 115 | 260 | 267 | | 41 | 18 | 244 | 248 | 133 |
| 177 | 104 | 259 | 20 | 43 | | 187 | 193 | 10 | 41 | 55 |
| 151 | 186 | 264 | 252 | 20 | | 78 | 66 | 72 | 193 | 263 |
| 143 | 245 | 63 | 77 | 103 | | 262 | 198 | 28 | 131 | 167 |
| 237 | 215 | 250 | 192 | 162 | | 37 | 76 | 46 | 41 | 206 |
| **List of selected NANDA diagnoses** | | | | | | | | | | |
| 1. **Risk for Impaired Attachment** 2. **Interrupted Breastfeeding** 3. **Ineffective Breathing Pattern** 4. **Readiness for Enhanced Breastfeeding** 5. **Impaired Parenting** (veya) **Caregiver Role Strain** 6. **Impaired Verbal Communication** 7. **Constipation** 8. **Risk for Constipation** 9. **Perceived Constipation** 10. **Contamination** 11. **Ineffective Family Coping** 12. **Impaired Autonomy in Decision-Making** (veya) **Impaired Ability to Make Independent Decisions** 13. **Ineffective Denial** 14. **Risk for Delayed Child Development** 15. **Ineffective Adolescent Eating Dynamics** (veya daha yaygın terimle) **Ineffective Adolescent Eating Patterns** 16. **Emotional Instability** (veya) **Emotional Regulation Disturbance** 17. **Imbalanced Energy Field** (NANDA tanısı olarak geçer) 18. **Readiness for Enhanced Exercise Pattern** 19. **Readiness for Enhanced Family Processes** 20. **Risk-Prone Health Behavior** 21. **Ineffective Health Self-Management** 22. **Hypothermia** 23. **Readiness for Enhanced Infant Behavior Organization** 24. **Risk for Infection** 25. **Readiness for Enhanced Knowledge** | | | | | 1. **Impaired** [Memory](file:///C:\Users\LENOVO\OneDrive\Masaüstü\25.07.2025%20kaynaksız.docx) 2. **Imbalanced Nutrition: Less Than Body Requirements** 3. **Risk for Overweight** 4. **Risk for Poisoning** 5. **Risk for Pressure Injury in a Child** 6. **Pressure Injury in a Newborn** (veya) **Neonatal Pressure Injury** 7. **Readiness for Enhanced Relationships** 8. **Risk for Ineffective Relationship** (veya) **Risk for Impaired Relationship Functioning** 9. **Relocation Stress Syndrome: Risk for** 10. **Readiness for Enhanced Resilience** 11. **Bathing Self-Care Deficit** 12. **Situational Low Self-Esteem** 13. **Self-Mutilation** (veya) **Risk for Self-Injury** 14. **Ineffective Infant Feeding Pattern: Suck-Swallow Coordination** 15. **Risk for Thermal Injury** 16. **Ineffective Thermoregulation** 17. **Risk for Thrombosis** 18. **Impaired Tissue Integrity** 19. **Ineffective Peripheral Tissue Perfusion** 20. **Risk for Urinary Retention** 21. **Risk for Vascular Trauma** 22. **Dysfunctional Response to Weaning from Mechanical Ventilation in Adults** 23. **Dysfunctional Ventilatory Weaning Response** 24. **Risk for Violence Directed at Others** 25. **Wandering** | | | | | |
| Randomization table and list of diagnoses selected after randomization | | | | | | | | |  |  |
